# Supplementary material
Source: MDPI journal article supplement (https://www.mdpi.com/search?q=molecules-25-00751)
Supplement: s001 [file molecules-25-00751-s001.pdf]

# SUPPLEMENTARY DATA

## Organic salts of *p*-coumaric acid and *trans*-ferulic acid with aminopicolines

Sosthene Nyomba Kamanda<sup>a</sup> and Ayesha Jacobs\*<sup>a</sup>

<sup>a</sup> *Department of Chemistry, Faculty of Applied Sciences, Cape Peninsula University of Technology, PO Box 1906, Cape Town 7535, South Africa. Tel: +27 21 959 3167; E-mail: [jacobsa@cput.ac.za](mailto:jacobsa@cput.ac.za).*

## HYDROGEN BOND DATA

Table S1. Geometrical data for hydrogen bonds of salt 1.

|             | D-H (Å) | H...A (Å) | D...A (Å) | <DHA (°) | Symmetry operation    |
|-------------|---------|-----------|-----------|----------|-----------------------|
| N1-H4...O2  | 0.95    | 1.71      | 2.662(2)  | 173.5    |                       |
| N2-H9A...O1 | 0.92    | 1.98      | 2.893(3)  | 171.6    |                       |
| O3-H1...O1  | 0.89    | 1.79      | 2.671(2)  | 169.6    | $x^{-1/2}, y, -z+3/2$ |
| N2-H9B...O2 | 0.82    | 2.60      | 3.365(2)  | 156.3    | $x+1/2, -y+1/2, -z+1$ |

Table S2. Geometrical data for hydrogen bonds of salt 2.

|               | D-H (Å) | H...A (Å) | D...A (Å) | <DHA (°) | Symmetry operation |
|---------------|---------|-----------|-----------|----------|--------------------|
| N1-H4...O1    | 0.88    | 1.87      | 2.741(3)  | 169      |                    |
| N2-H9A...O2   | 0.93    | 1.92      | 2.822(4)  | 165.7    |                    |
| N3-H14...O4   | 0.95    | 1.82      | 2.753(3)  | 165.5    |                    |
| N4-H16A...O5  | 1.00    | 1.76      | 2.758(3)  | 172.3    |                    |
| N5-H19...O7   | 0.97    | 1.80      | 2.722(2)  | 159.4    |                    |
| N6-H24A...O8  | 0.87    | 2.00      | 2.845(3)  | 163.5    |                    |
| N7-H29...O10  | 0.97    | 1.81      | 2.793(3)  | 158.6    |                    |
| N8-H31...O11  | 0.93    | 1.87      | 2.793(3)  | 167.7    |                    |
| N2-H9B...O4   | 0.94    | 2.05      | 2.941(3)  | 156.1    |                    |
| N4-H16B...O7  | 0.99    | 1.90      | 2.861(3)  | 162.7    |                    |
| N6-H24B...O10 | 0.92    | 2.06      | 2.898(3)  | 151.8    |                    |
| O3-H1...O8    | 0.92    | 1.77      | 2.668(3)  | 165.1    | $-x, y-1/2, 1-z$   |
| O9-H9...O2    | 0.90    | 1.72      | 2.621(3)  | 175.8    | $1-x, 1/2+y, 1-z$  |
| N8-H31B...O1  | 0.96    | 1.97      | 2.894(3)  | 161.0    | $x, y, 1+z$        |
| O6-H10...O5   | 0.96    | 1.71      | 2.666(3)  | 171.1    | $-x, 1/2+y, 1-z$   |
| O12-H25...O11 | 0.89    | 1.73      | 2.606(3)  | 169.1    | $1-x, y-1/2, 2-z$  |

Table S3. Geometrical data for hydrogen bonds of salt **3**.

|              | D-H (Å) | H...A (Å) | D...A (Å) | <DHA (°) | Symmetry operation    |
|--------------|---------|-----------|-----------|----------|-----------------------|
| N1-H1...O2   | 0.90(3) | 1.75 (3)  | 2.647(3)  | 172(3)   |                       |
| N2-H3A...O1  | 1.05(3) | 1.85(3)   | 2.904(3)  | 175(2)   |                       |
| O6-H13...O2  | 0.97(4) | 1.75(4)   | 2.661(2)  | 156(4)   |                       |
| O6-H13...O2  | 0.95(4) | 1.64(4)   | 2.589(3)  | 174(3)   |                       |
| N2-H3B...O4  | 0.91    | 2.10(4)   | 2.964(3)  | 156(3)   | $x-1/2, y+5/2, z-1/2$ |
| O5-H9B...O1  | 0.92(4) | 1.84(4)   | 2.745(3)  | 169(3)   | $-x, -y+2, -z$        |
| O5-H9A...O6  | 0.64(4) | 2.16(4)   | 2.789(3)  | 170(5)   | $x, y-1, z$           |
| C12-H12...O3 | 0.95    | 3.28      | 3.447(3)  | 92.2     | $-x, -y+3, -z$        |

## TORSION ANGLES

Table S4. Torsion angles of salts **1**, **2** and **3**.

|                               | <b>1</b> | <b>2</b> | <b>3</b> |
|-------------------------------|----------|----------|----------|
| Torsion angle                 | (°)      | (°)      | (°)      |
| $\tau_1$ (C2-C1-C7-C8)        | 12.8     | 14.4     | 0.2      |
| $\tau'_1$ (C17-C16-C22-C23)   | -        | 0.5      | -        |
| $\tau''_1$ (C32-C31-C37-C38)  | -        | 2.7      | -        |
| $\tau'''_1$ (C47-C46-C52-C53) | -        | 4.6      | -        |
| $\tau_2$ (C7-C8-C9-O1)        | 10.1     | 12.8     | 4.9      |
| $\tau'_2$ (C22-C23-C24-O4)    | -        | 26.7     | -        |
| $\tau''_2$ (C37-C38-C39-O7)   | -        | 9.1      | -        |
| $\tau'''_2$ (C52-C53-C54-O10) | -        | 5.1      | -        |

# HIRSHFELD SURFACE ANALYSIS

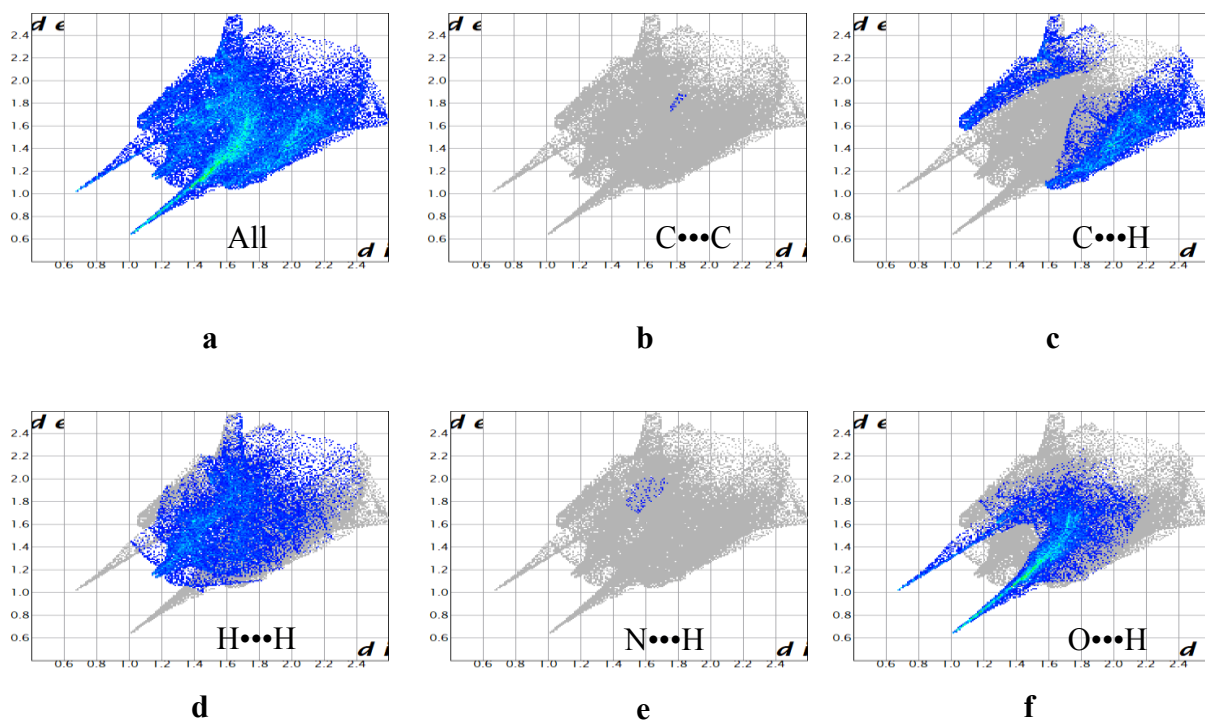

Figure S1. Fingerprint plot of  $p$ CA in salt 1.

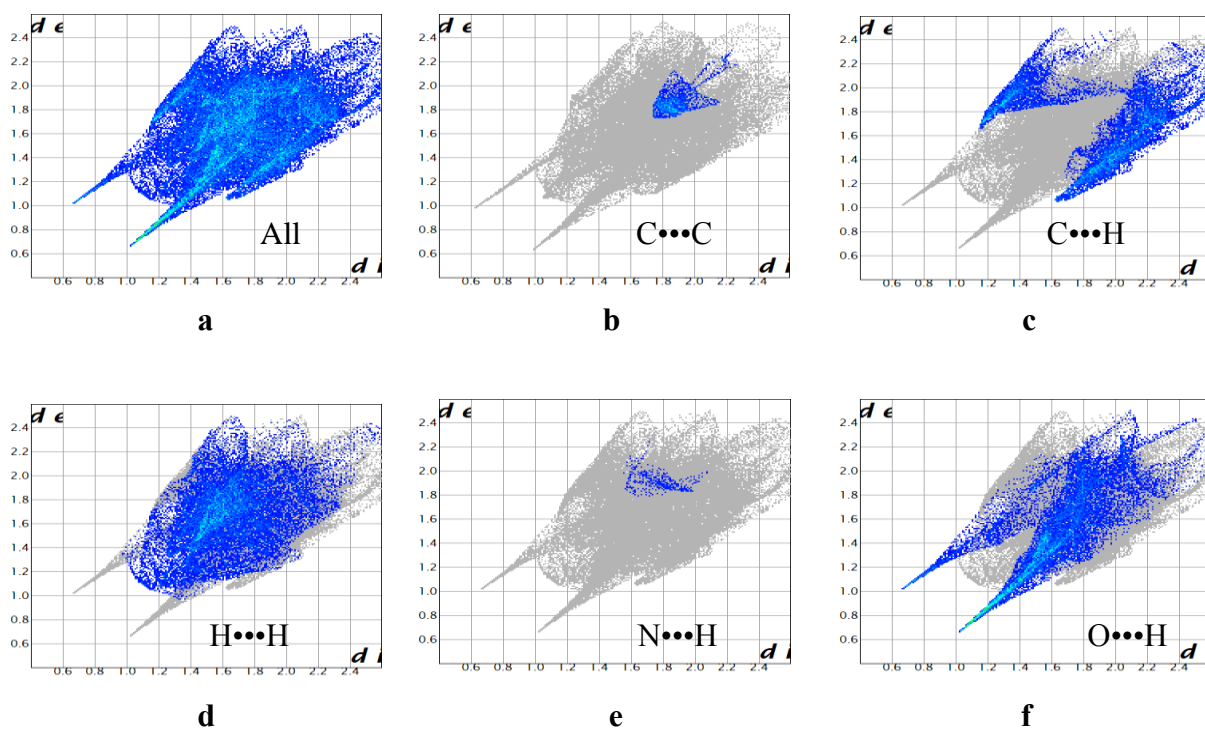

Figure S2 Fingerprint plot of  $p$ CA in salt 2.

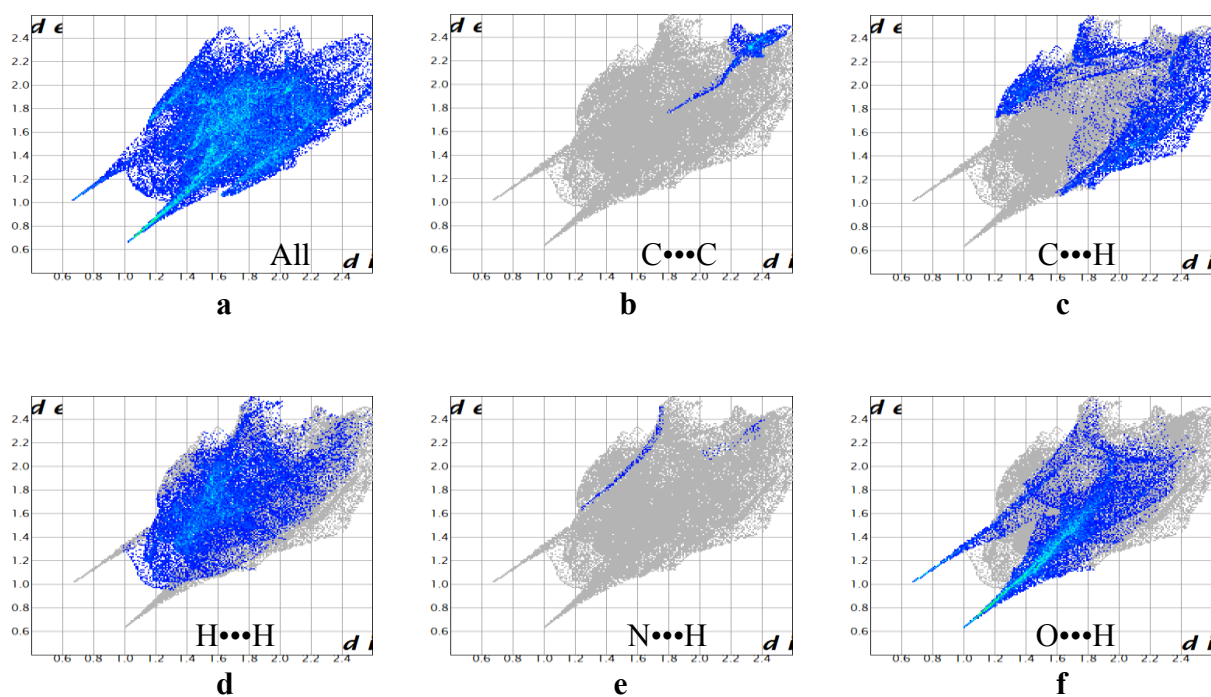

Figure S3. Fingerprint plot of  $pCA'$  in salt 2.

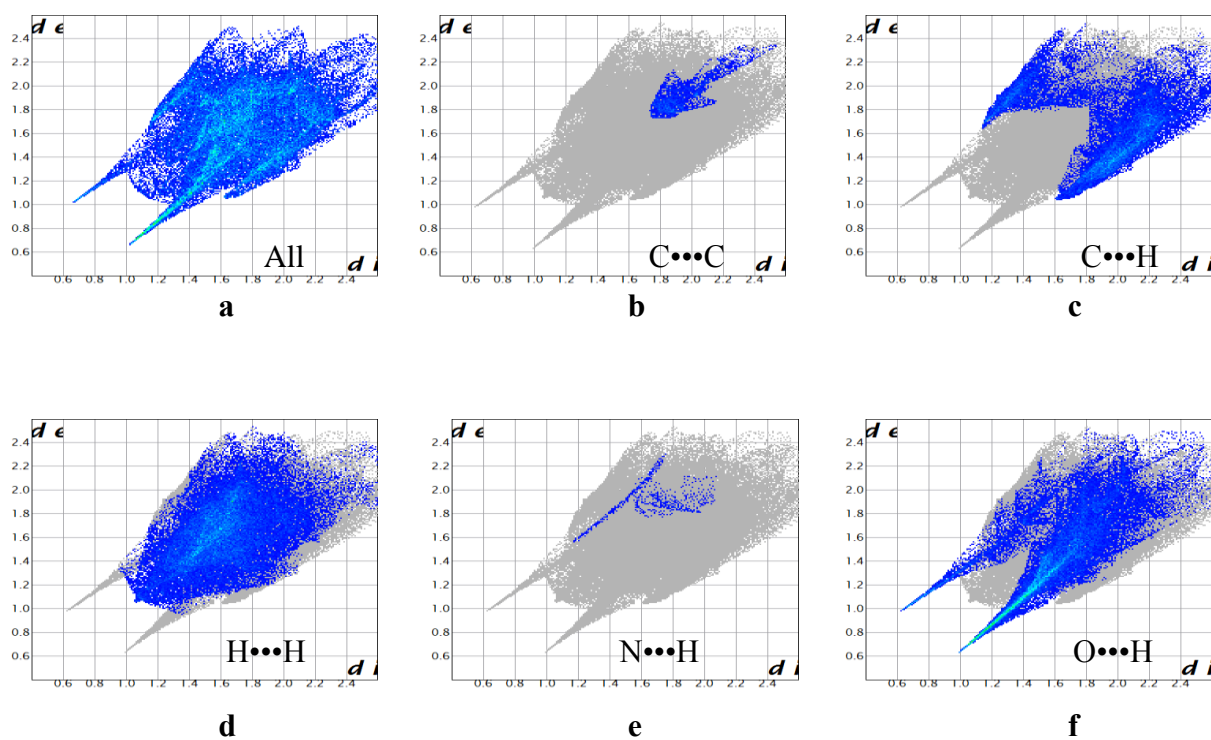

Figure S4. Fingerprint plot of  $pCA''$  in salt 2.

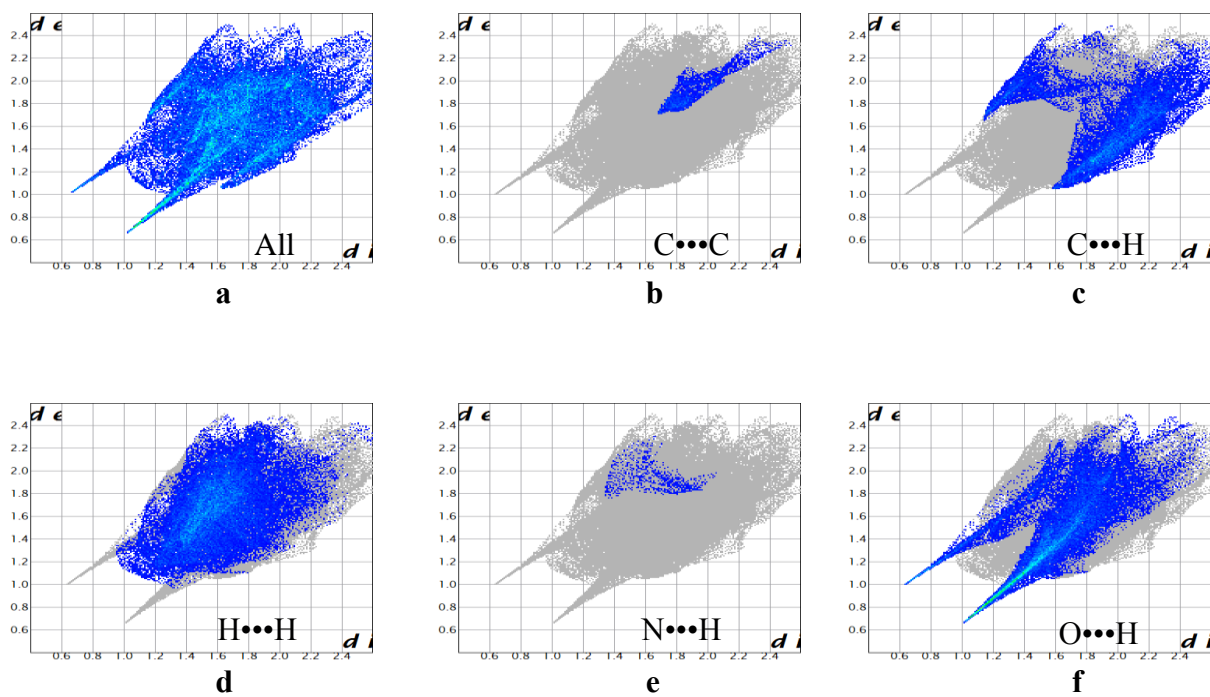

Figure S5. Fingerprint plot of  $pCA'''$  in salt 2.

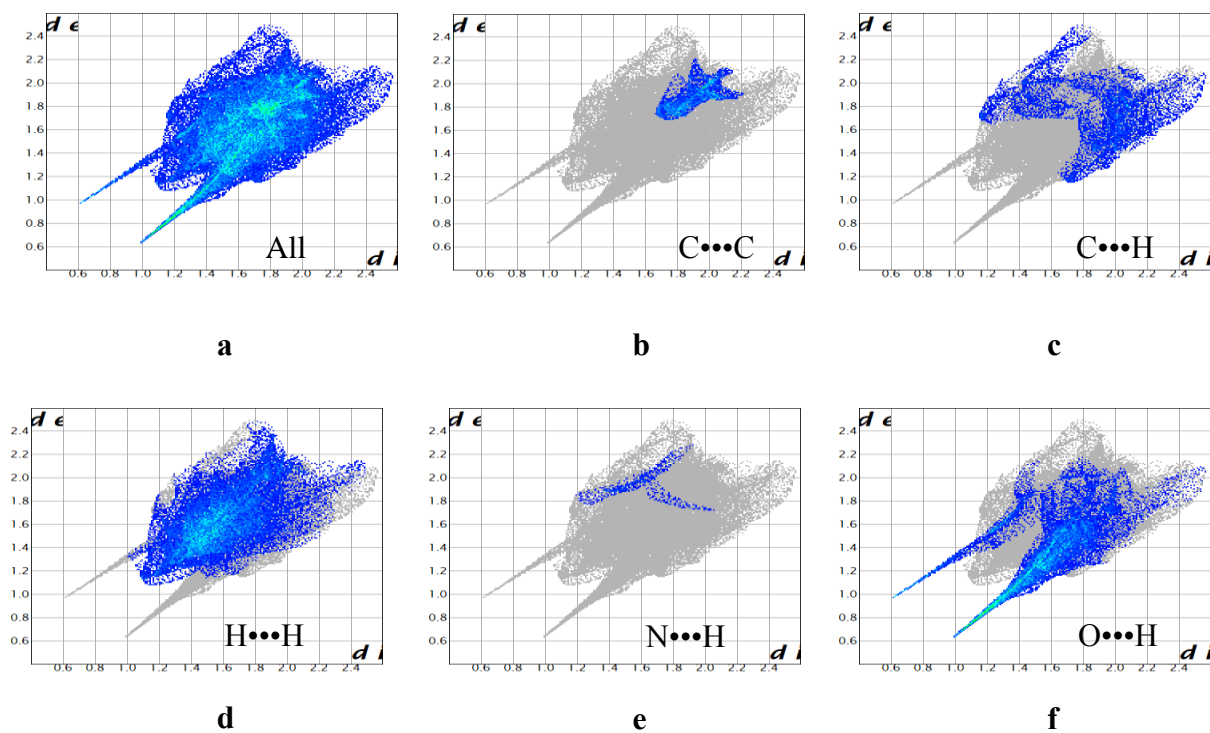

Figure S6. Fingerprint plot of TFA in salt 3.

Table S5. Quantitative summary of the various interactions of *p*CA and TFA salts.

| Salt |                | C...C (%) | C...H (%) | H...H (%) | N...H (%) | O...H (%) |
|------|----------------|-----------|-----------|-----------|-----------|-----------|
| 1    |                | 0.1       | 29.6      | 38.3      | 0.2       | 30.1      |
| 2    | <i>p</i> CA    | 1.7       | 25.2      | 38.9      | 0.7       | 30.8      |
|      | <i>p</i> CA'   | 3.4       | 22.7      | 38.4      | 0.5       | 31.6      |
|      | <i>p</i> CA''  | 2.8       | 23.3      | 40        | 0.7       | 30.7      |
|      | <i>p</i> CA''' | 2.5       | 21.9      | 39.6      | 0.8       | 32.1      |
| 3    |                | 7.5       | 13.5      | 45.1      | 1.3       | 29.5      |

## GRINDING EXPERIMENTS

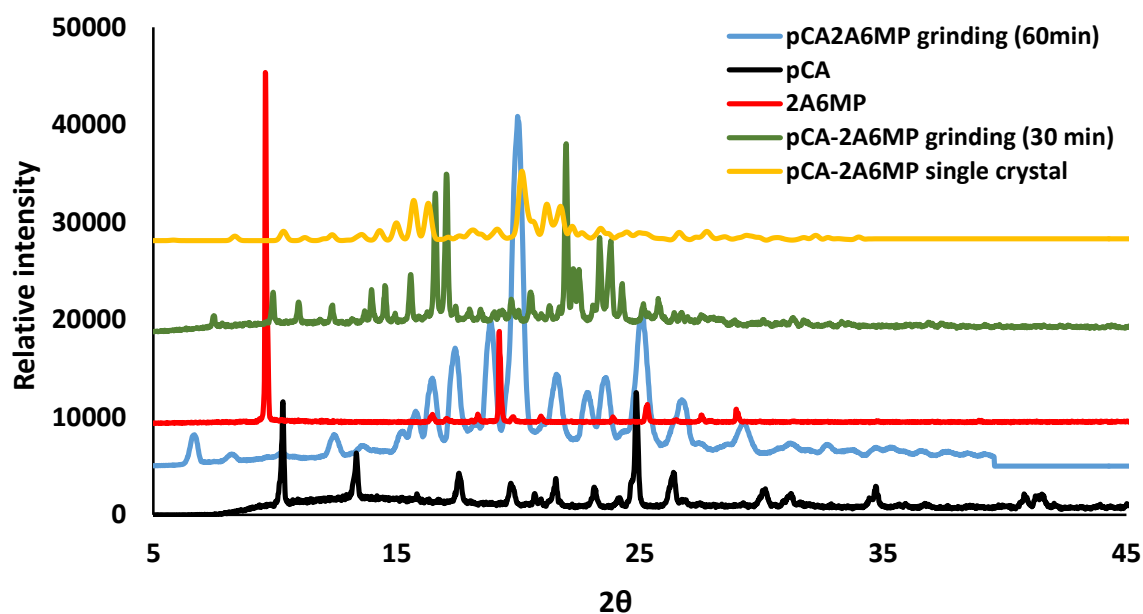

Figure S7. PXRD analyses of *p*CA and 2A6MP grinding (60 min) (blue), *p*CA (black), 2A6MP (red), *p*CA2A6MP grinding (30 min) (green) and the calculated pattern (yellow).

## FTIR SPECTRA

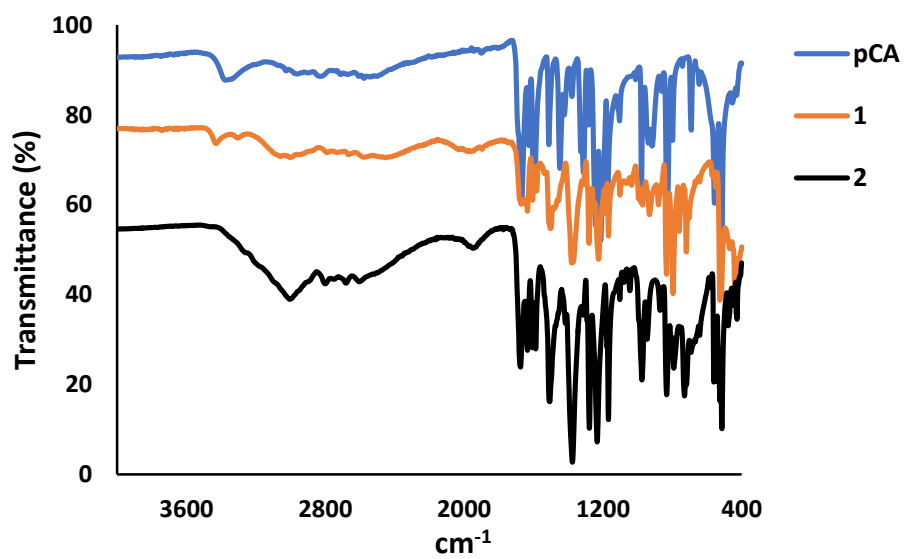

Figure S8. FTIR spectra of *p*CA (blue), salt 1 (orange) and salt 2 (black).

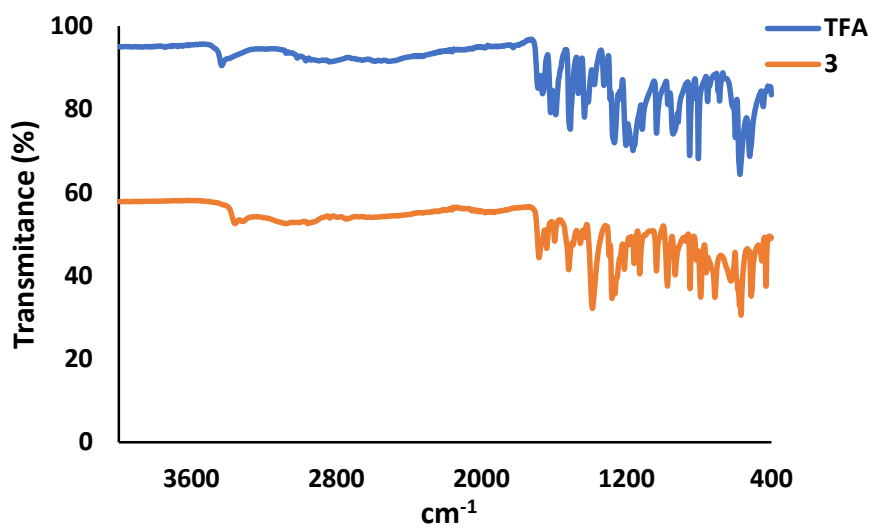

Figure S9. FTIR spectra of TFA (blue) and salt 3 (orange).
